# Supplementary material for: Annealing synchronizes the 70S ribosome into a minimum-energy conformation
Source: PubMed Central journal article supplement — Proc Natl Acad Sci U S A. 2022 Feb 17;119(8):e2111231119. doi: 10.1073/pnas.2111231119 (PMC8872765; doi:10.1073/pnas.2111231119), 2022-02-17
Supplement: pnas.2111231119.sapp.pdf [file pnas.2111231119.sapp.pdf]

# Supplementary Materials for

## **Annealing synchronizes the 70S ribosome into a minimum-energy conformation**

**Authors:** Xiaofeng Chu<sup>1,2†</sup>, Xin Su<sup>1,3†</sup>, Mingdong Liu<sup>1,4,5†</sup>, Li Li<sup>3</sup>, Tianhao Li<sup>1,4</sup>, Yicheng Qin<sup>1</sup>, Guoliang Lu<sup>3</sup>, Lei Qi<sup>2</sup>, Yunhui Liu<sup>1</sup>, Jinzhong Lin<sup>3</sup>, Qing-Tao Shen<sup>1,2\*</sup>

### **Affiliations:**

<sup>1</sup>Human Institute and School of Life Science and Technology, ShanghaiTech University, Shanghai 201210, China.

<sup>2</sup>Laboratory for Marine Biology and Biotechnology, Qingdao National Laboratory for Marine Science and Technology, Qingdao 266237, China.

<sup>3</sup>State Key Laboratory of Genetic Engineering, School of Life Sciences, Zhongshan Hospital, Fudan University, Shanghai, 200438, China.

<sup>4</sup>University of Chinese Academy of Sciences, Beijing 100049, China.

<sup>5</sup>Shanghai Institute of Biochemistry and Cell Biology, Center for Excellence in Molecular Cell Science, Chinese Academy of Science, Shanghai, 200031, China.

†These authors contributed equally: Xiaofeng Chu, Xin Su, Mingdong Liu

\*Corresponding author: Qing-Tao Shen

Email: Qing-Tao Shen ([shenqt@shanghaitech.edu.cn](mailto:shenqt@shanghaitech.edu.cn))

### **This PDF file includes:**

Supplementary Text

Figures S1 to S18

Table S1

Captions for Movies S1 to S2

## Supplementary Text:

### Structural comparison of 70S ribosomes under various conditions

In our work, 70S ribosomes under various conditions were resolved via single-particle cryo-EM. Corresponding structural comparisons indicated that annealing could synchronize 70S ribosomes, especially flexible regions, into homogenous states with improved local resolution. To objectively compare 70S ribosomes, we tested reconstruction as follows:

1) Same batch of ribosomes. 70S ribosomes were aliquoted and stored at  $-80^{\circ}\text{C}$  and unused ribosomes were discarded after thawing.

2) Same data collection conditions. The same microscope (Titan Krios G<sup>3i</sup>) with the same camera (Gatan K3 BioQuantum) was used for all data collections. Total electron dose, defocus, and other pertinent values were set to be the same.

3) Same data processing pipeline. The procedure as described in the *SI Appendix*, Fig. S2A was consistently applied to all 70S ribosomes under various conditions.

4) Same data screening strategy. Only obvious junk and disassembled ribosomes were removed from the dataset. In most datasets, 82.3% to 93.7% of the particles were selected after 2D and 3D classifications. Three exceptions were the heated ribosome (S2) and annealed ribosomes (S9 and S10). Ribosomes (S9 and S10) were heated to  $55^{\circ}\text{C}$  and  $65^{\circ}\text{C}$ , respectively (closer to the  $\sim 72^{\circ}\text{C}$  melting temperature of bacterial ribosome), for 5 min; these 70S ribosomes readily fell apart. Regarding the protocol S2, ribosomes were vitrified at  $37^{\circ}\text{C}$  as the heated state. Compared with ribosomes under other conditions, more unsatisfactory particles ( $\sim 46.9\%$ ) were excluded from the final reconstruction, but the local resolution of 30S subunit was still inferior.

5) Same number of particles (200,000) for the final reconstruction, for comparison.

6) Repeating experiments. Repeats were performed on three representative conditions, including the unannealed (S1), heated (S2), and annealed (S5) ribosomes. A new batch of 70S ribosomes was used and reconstructed. There was no obvious structural difference between two parallel experiments.

In summary, the structural differences should be attributable to differences in treatments.

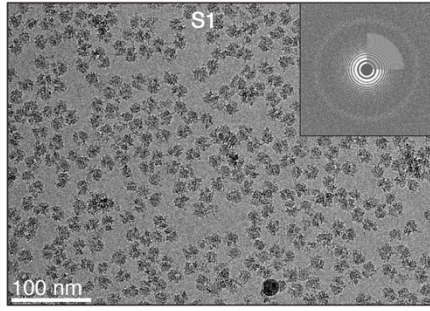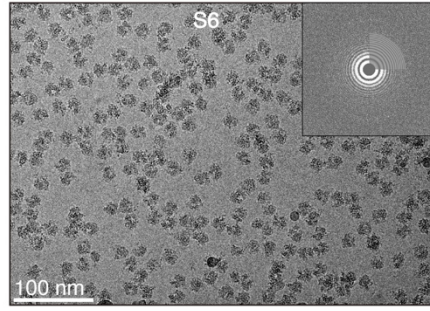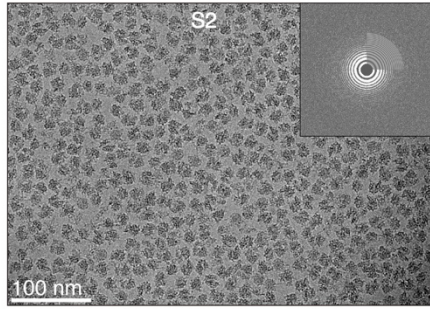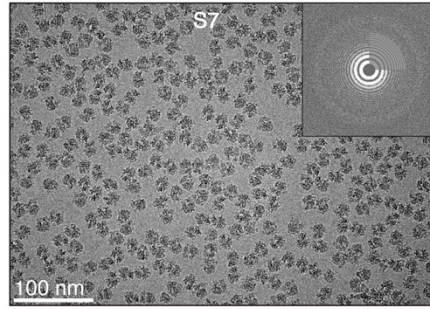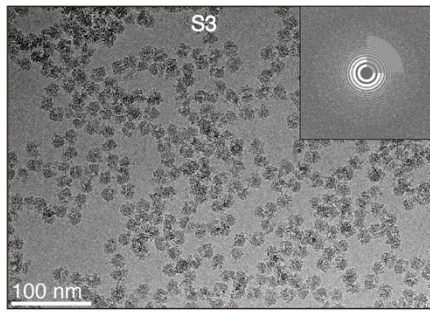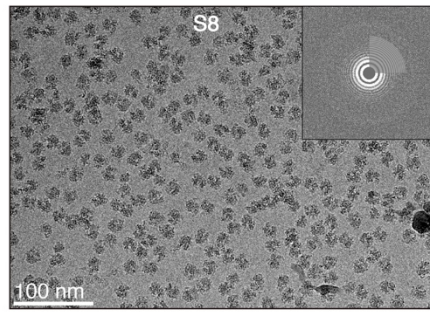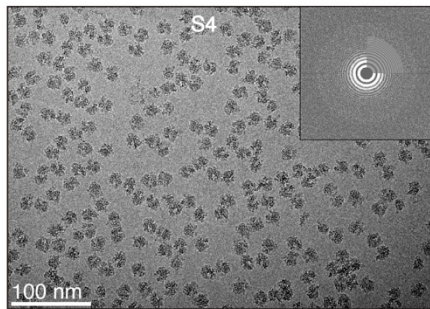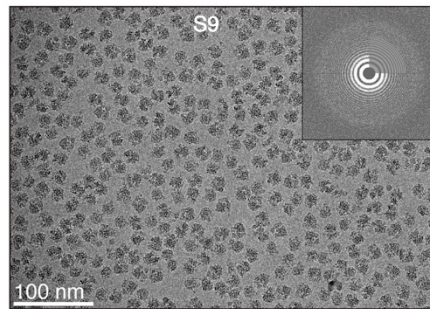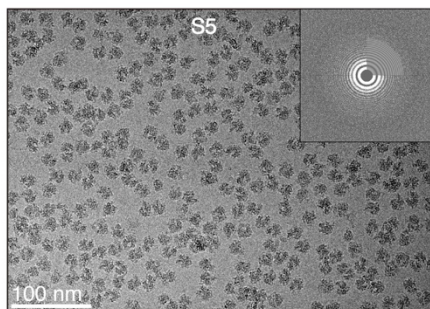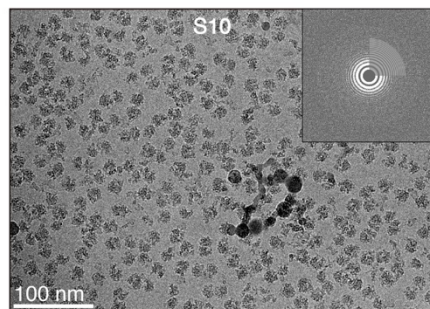

**Figure S1.** Typical cryo-EM images under various conditions and their respective power spectra  
Fig. 2B lists detailed conditions for protocols S1–S10.

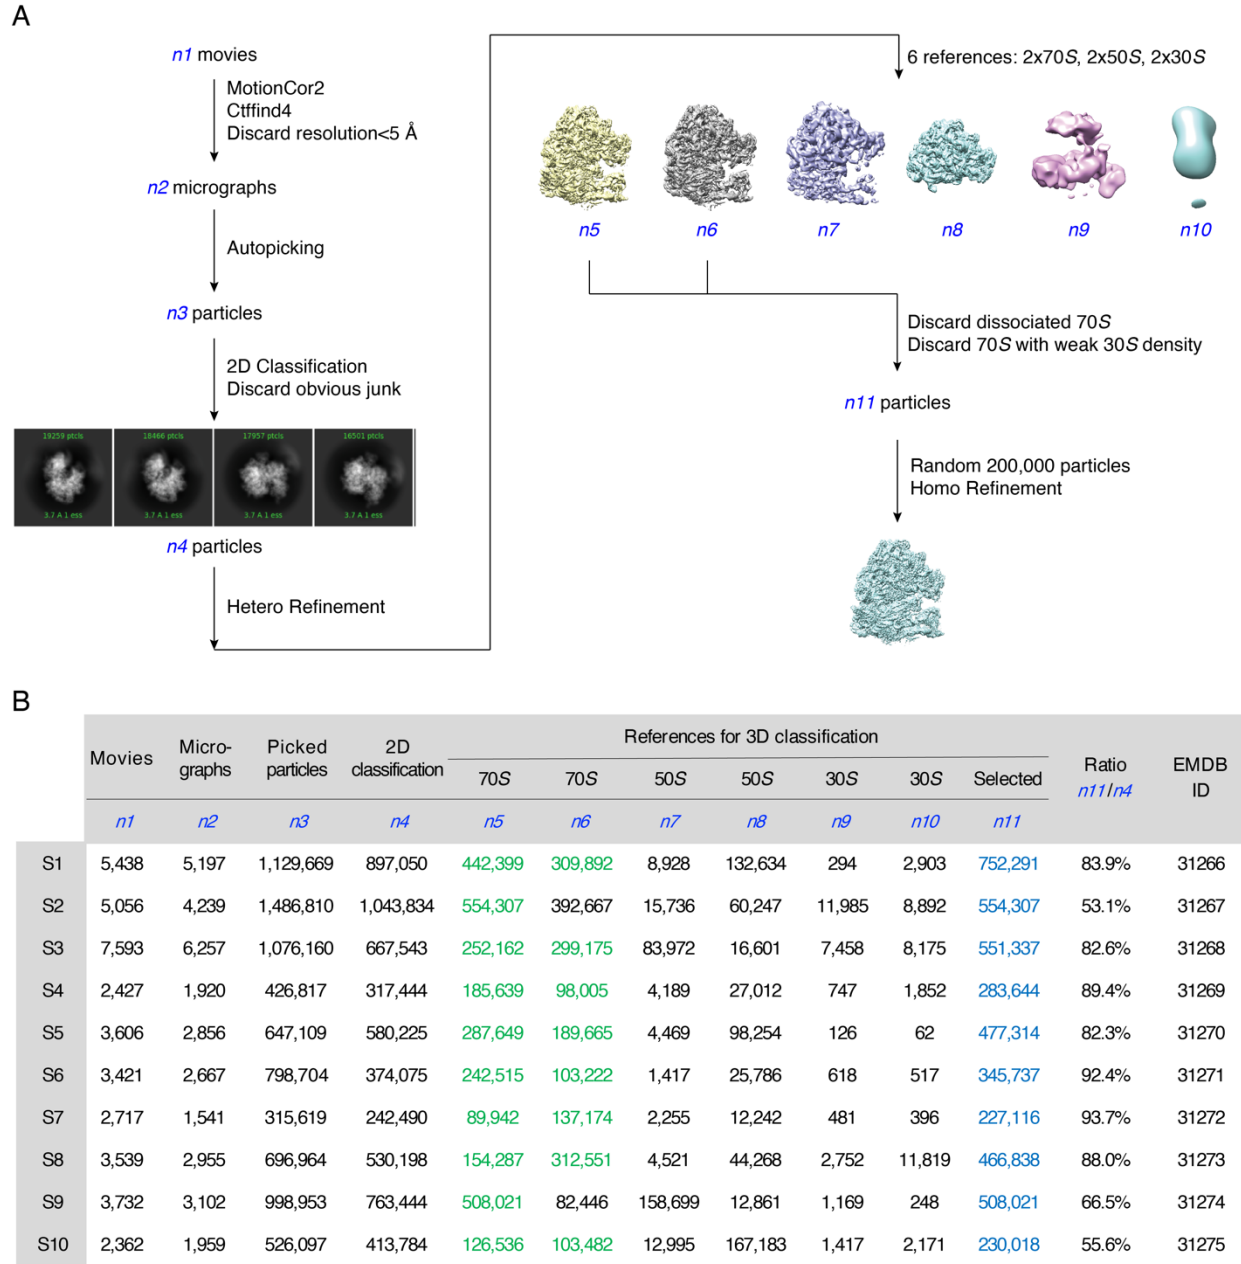

**Figure S2.** 3D reconstructions of 70S ribosomes under various conditions

(A) The same flow chart was used for 3D reconstruction of 70S ribosomes under various conditions. (B) Detailed numbers from  $n_1$ – $n_{11}$  in (A) and the corresponding deposited EMDB IDs are listed.

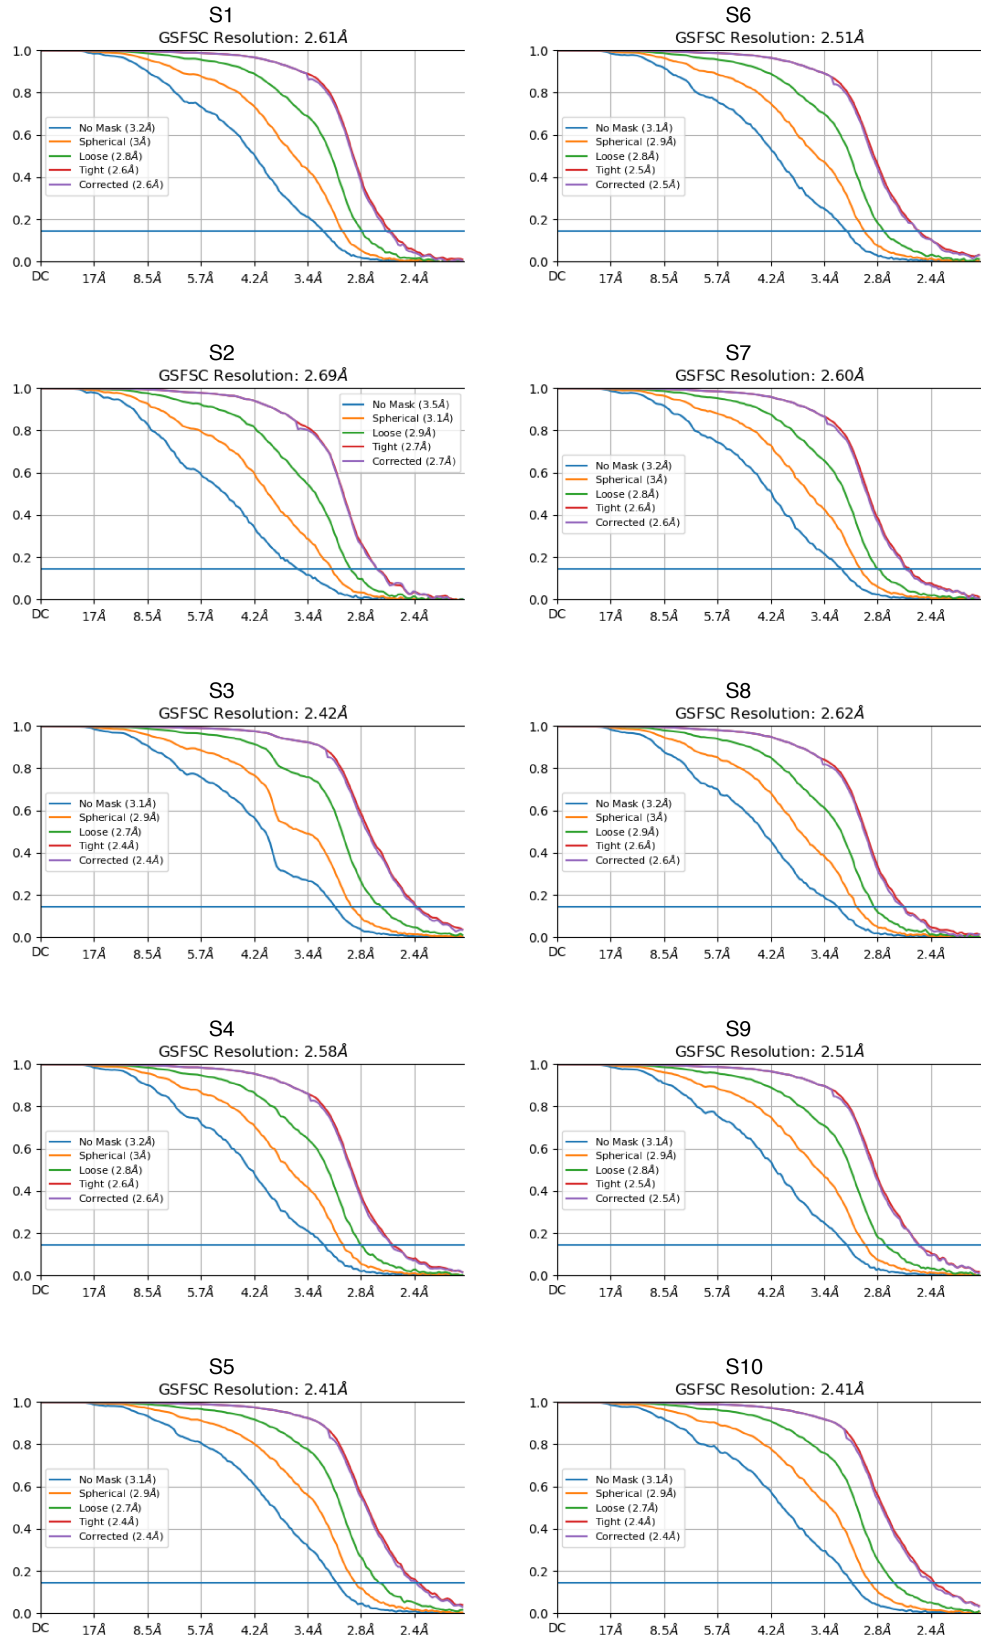

**Figure S3.** FSC curves for 70S ribosomes under various conditions

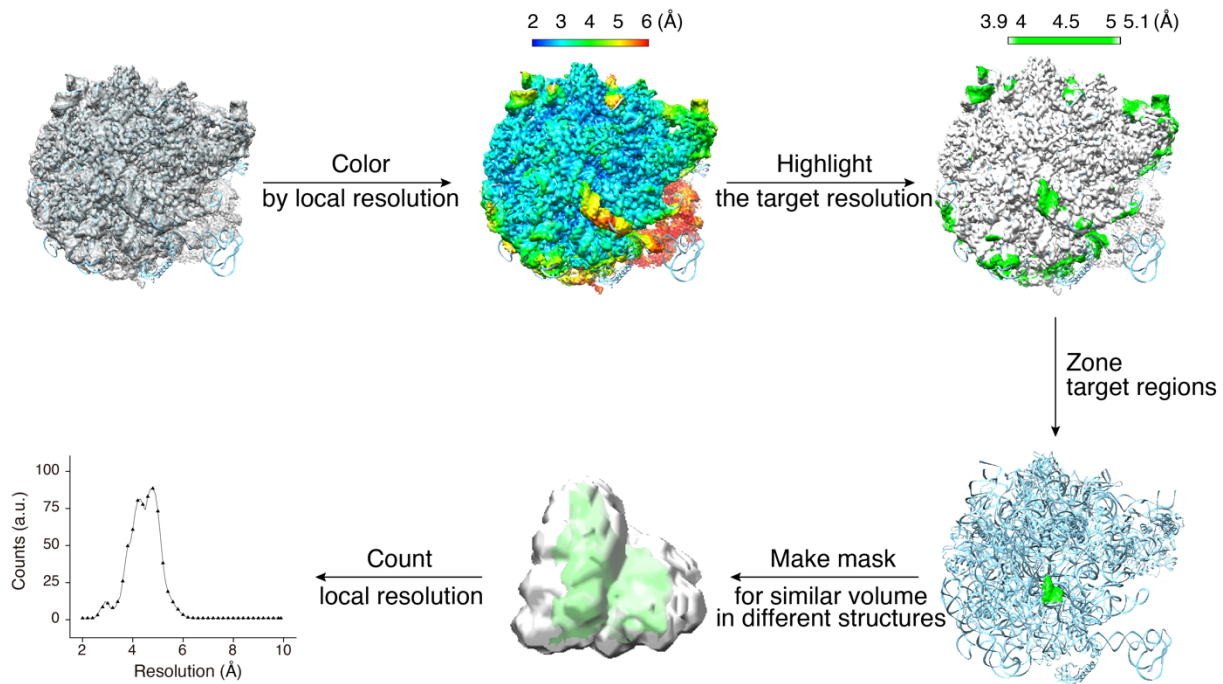

**Figure S4.** Flow chart for local resolution calculation on selected regions

To compare local resolutions from different structures, the volumes of the target regions in different EM maps were adjusted to the same level via changing thresholds.

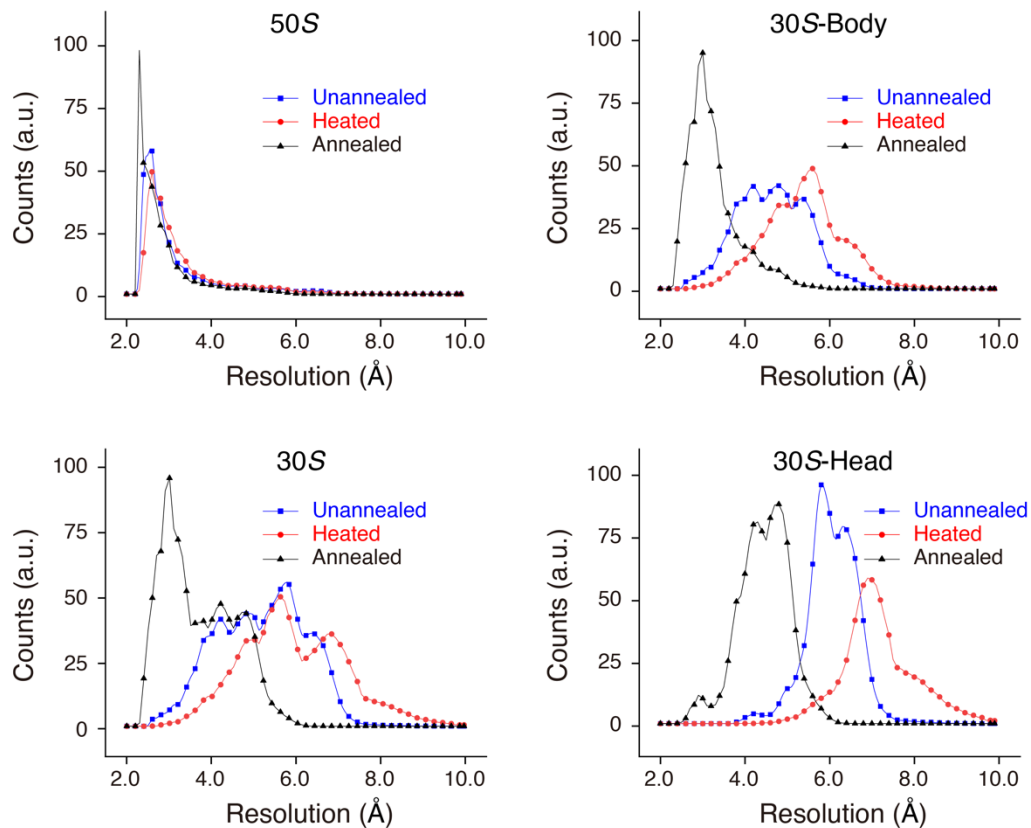

**Figure S5.** Local resolution histograms of different subdomains from the unannealed, heated, and annealed 70S ribosomes

The mean and standard deviation from these histograms were calculated (Fig. 1B). “a.u.” means arbitrary units.



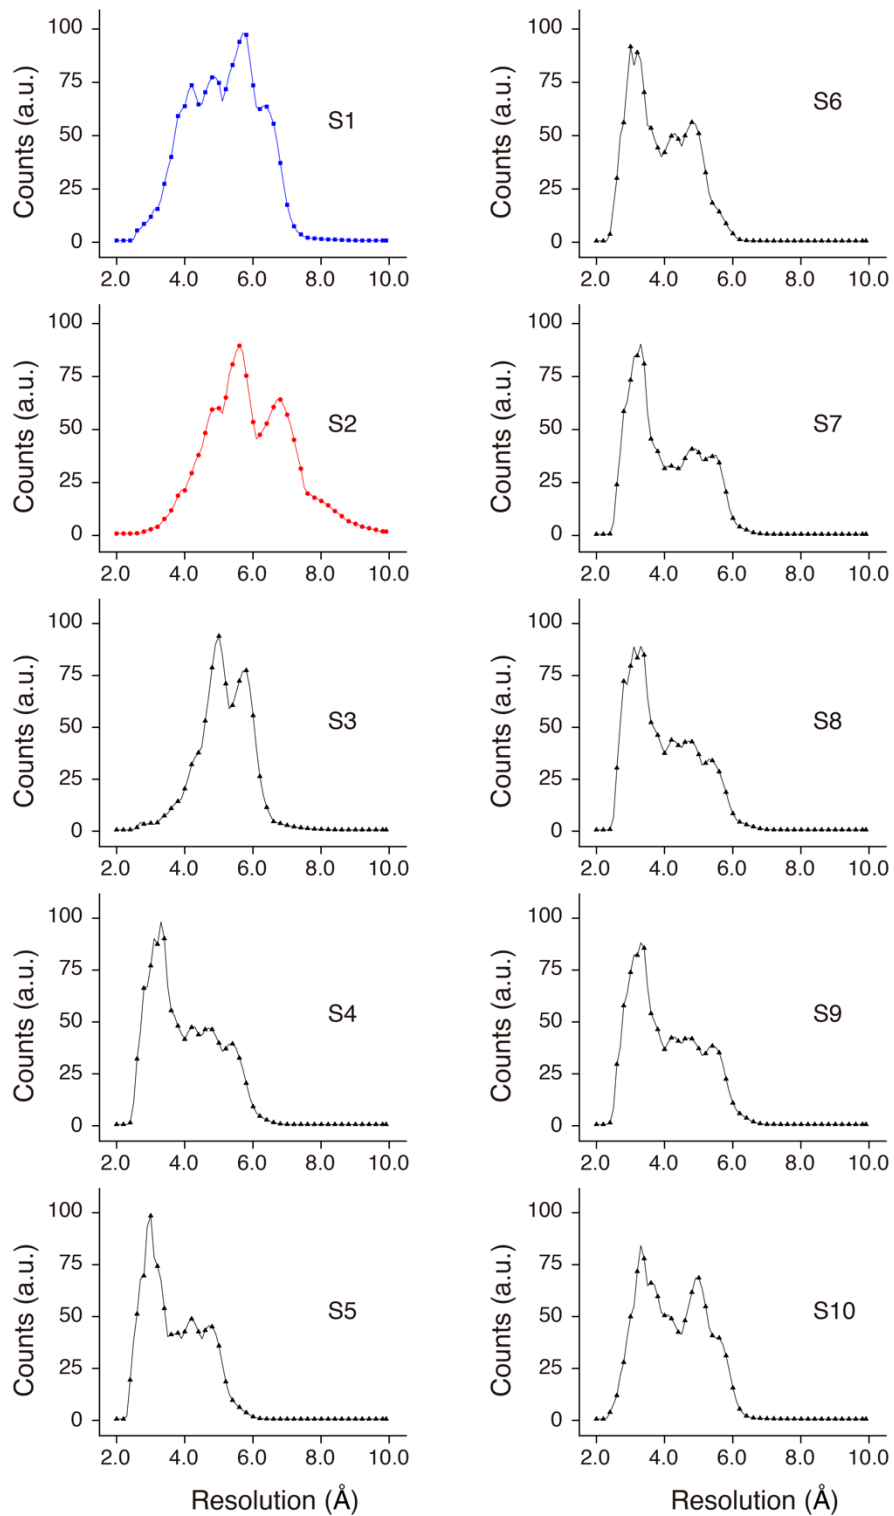

**Figure S6.** Local resolution histograms of 30S subunits under various conditions. The mean and standard deviation from these histograms were calculated (Fig. 2C).

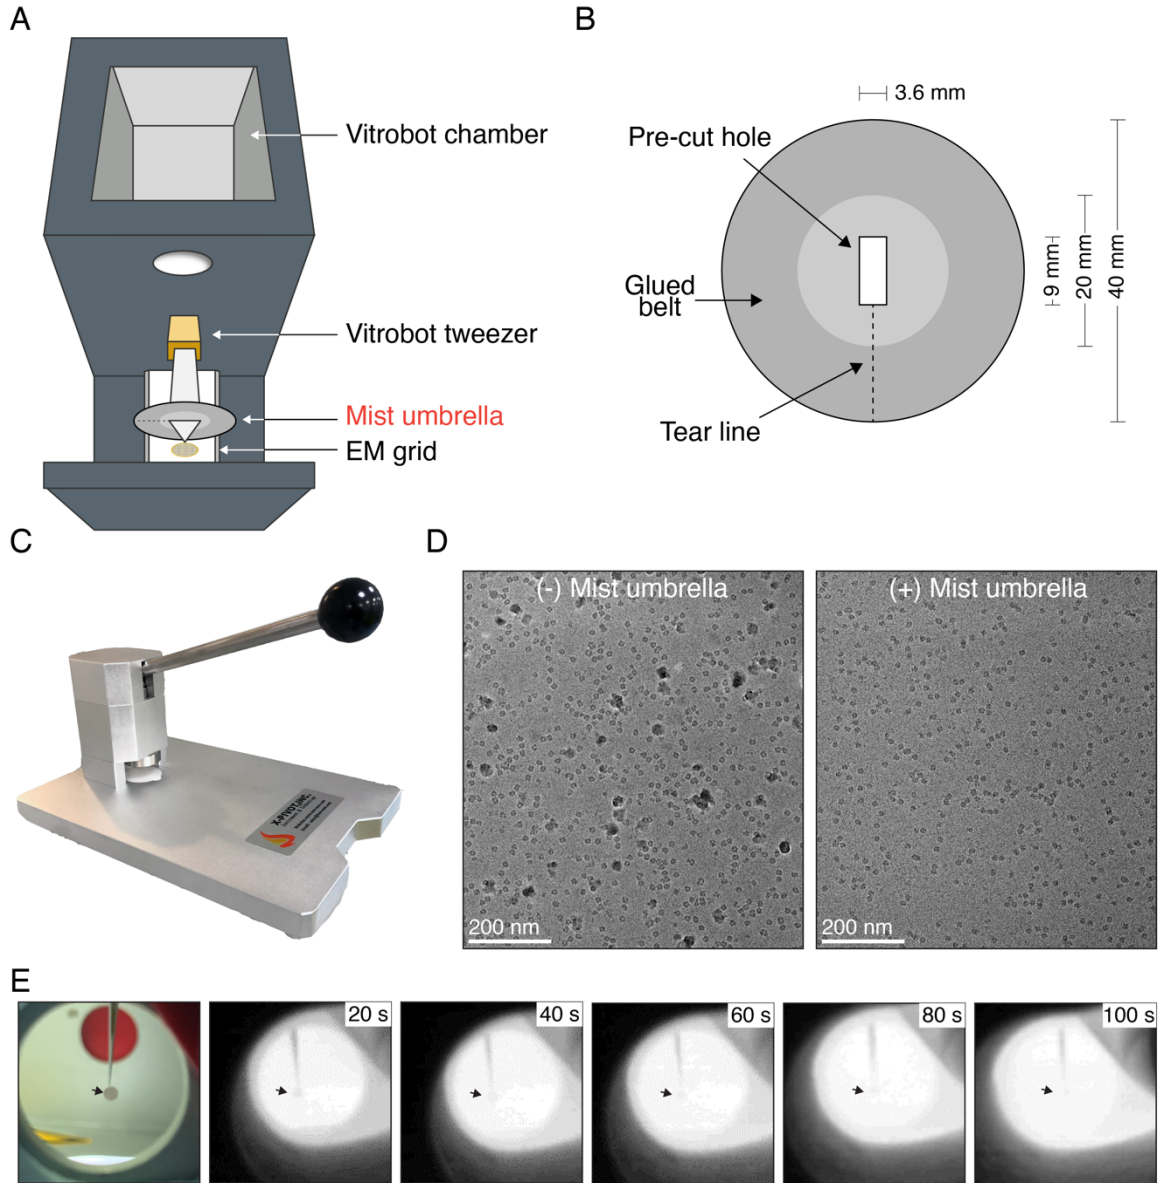

**Figure S7.** Optimization for temperature-dependent cryo-EM

(A) Diagram for the Vitrobot device with a mist umbrella. (B) Detailed parameters for the mist umbrella. Briefly, there is a pre-cut hole on round filter paper. (C) Home-made device to fabricate mist umbrellas. (D) Cryo-EM micrographs with or without a mist umbrella. (E) Heat exchange between grids and the Vitrobot chamber reached a balance in  $\sim 100$  s. Black arrow points to the position of the cryo-EM grid.

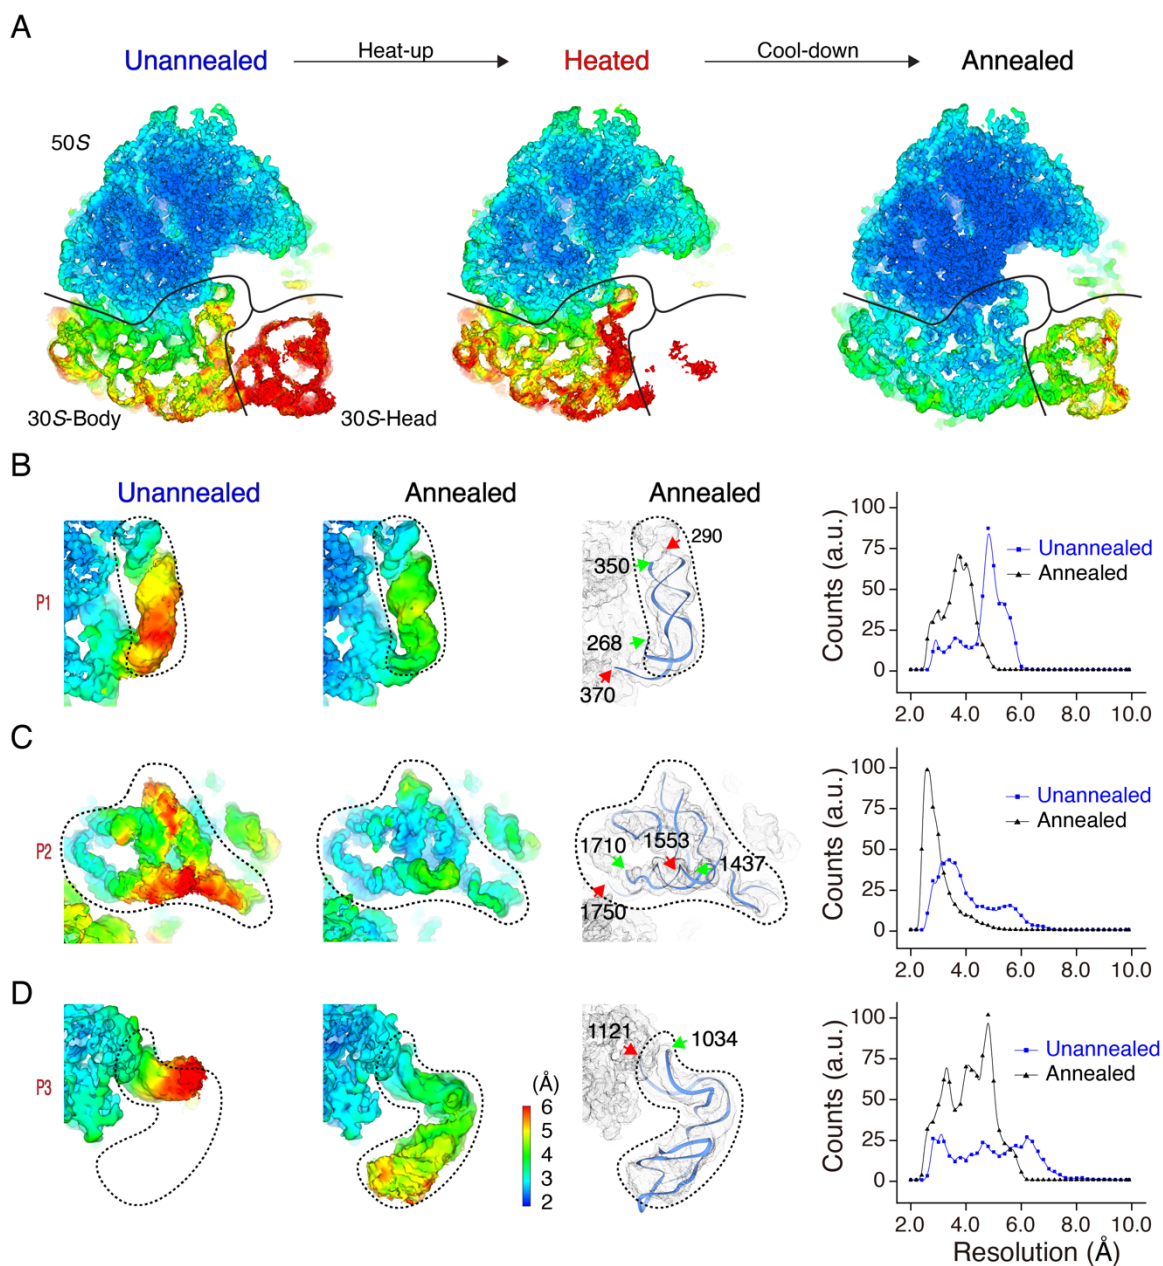

**Figure S8.** Annealing stabilizes flexible regions on the periphery of the 50S subunit

(A) Central slice of local resolution maps of the unannealed, heated, and annealed 70S ribosomes. (B–D) Annealing stabilizes three typical flexible regions on the periphery of the 50S subunit. The positions of P1, P2, and P3 in 70S ribosomes are shown in Fig. 1A. Local resolution maps and histograms in the unannealed and annealed conditions are shown. Models were based on the annealed structures. Green and red arrows indicate the start and end, respectively, of selected strands.

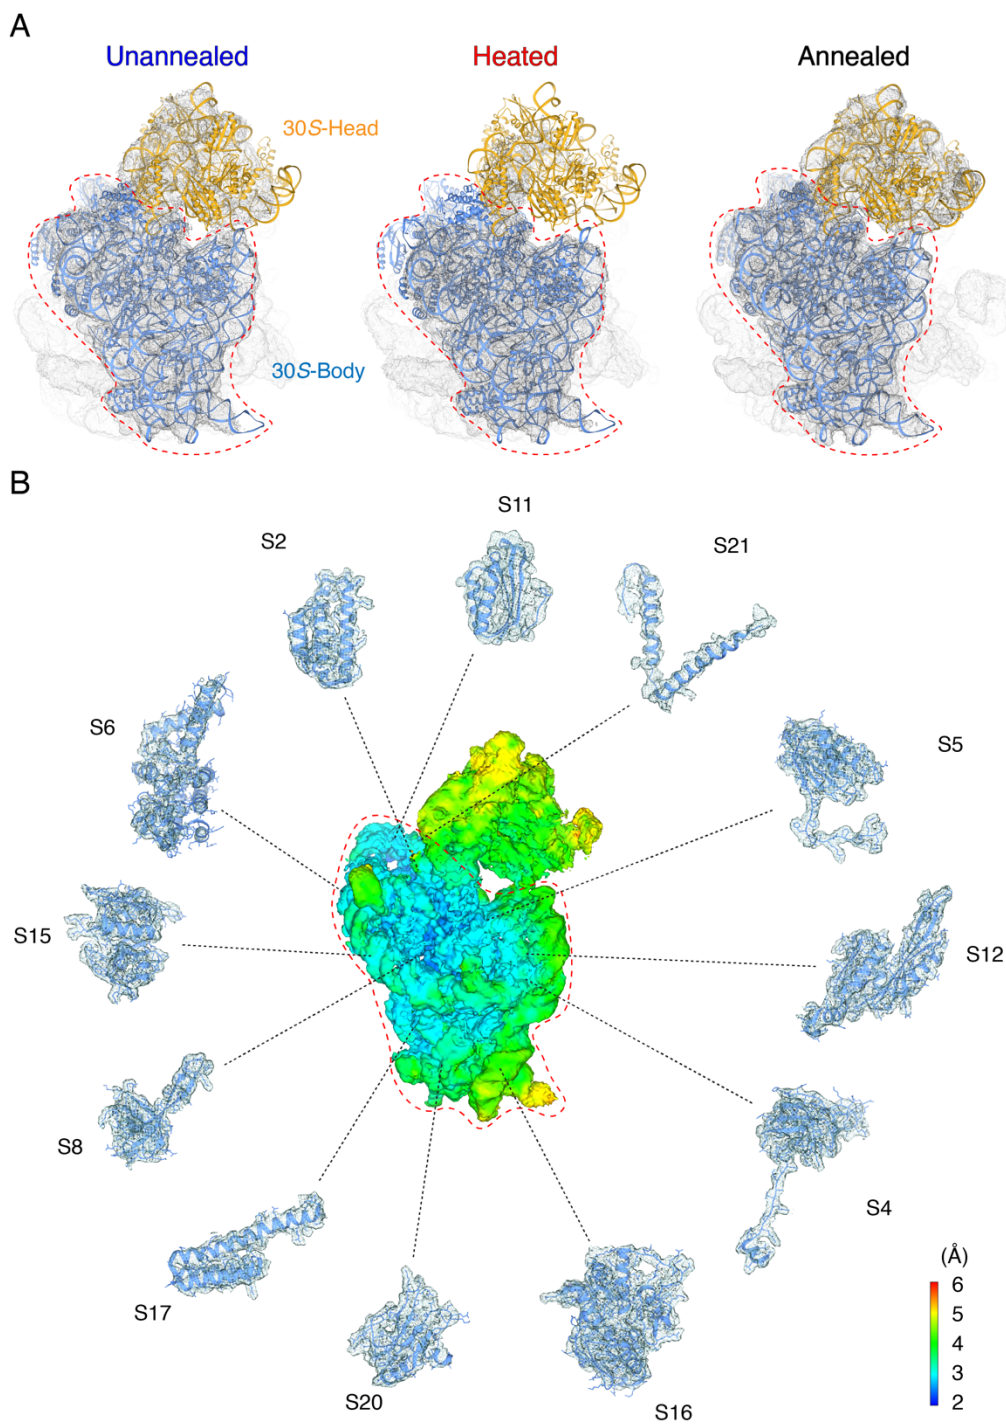

**Figure S9.** Modeling of 30S subunits from the unannealed, heated, and annealed ribosomes

(A) Docking of the atomic model of the 30S subunit into the unannealed, heated, and annealed ribosomes. The body domains of the 30S subunit were marked for high docking accuracy in all ribosomes. (B) Expanded view of peripheral proteins fitting into the body domain of the annealed 30S subunit.

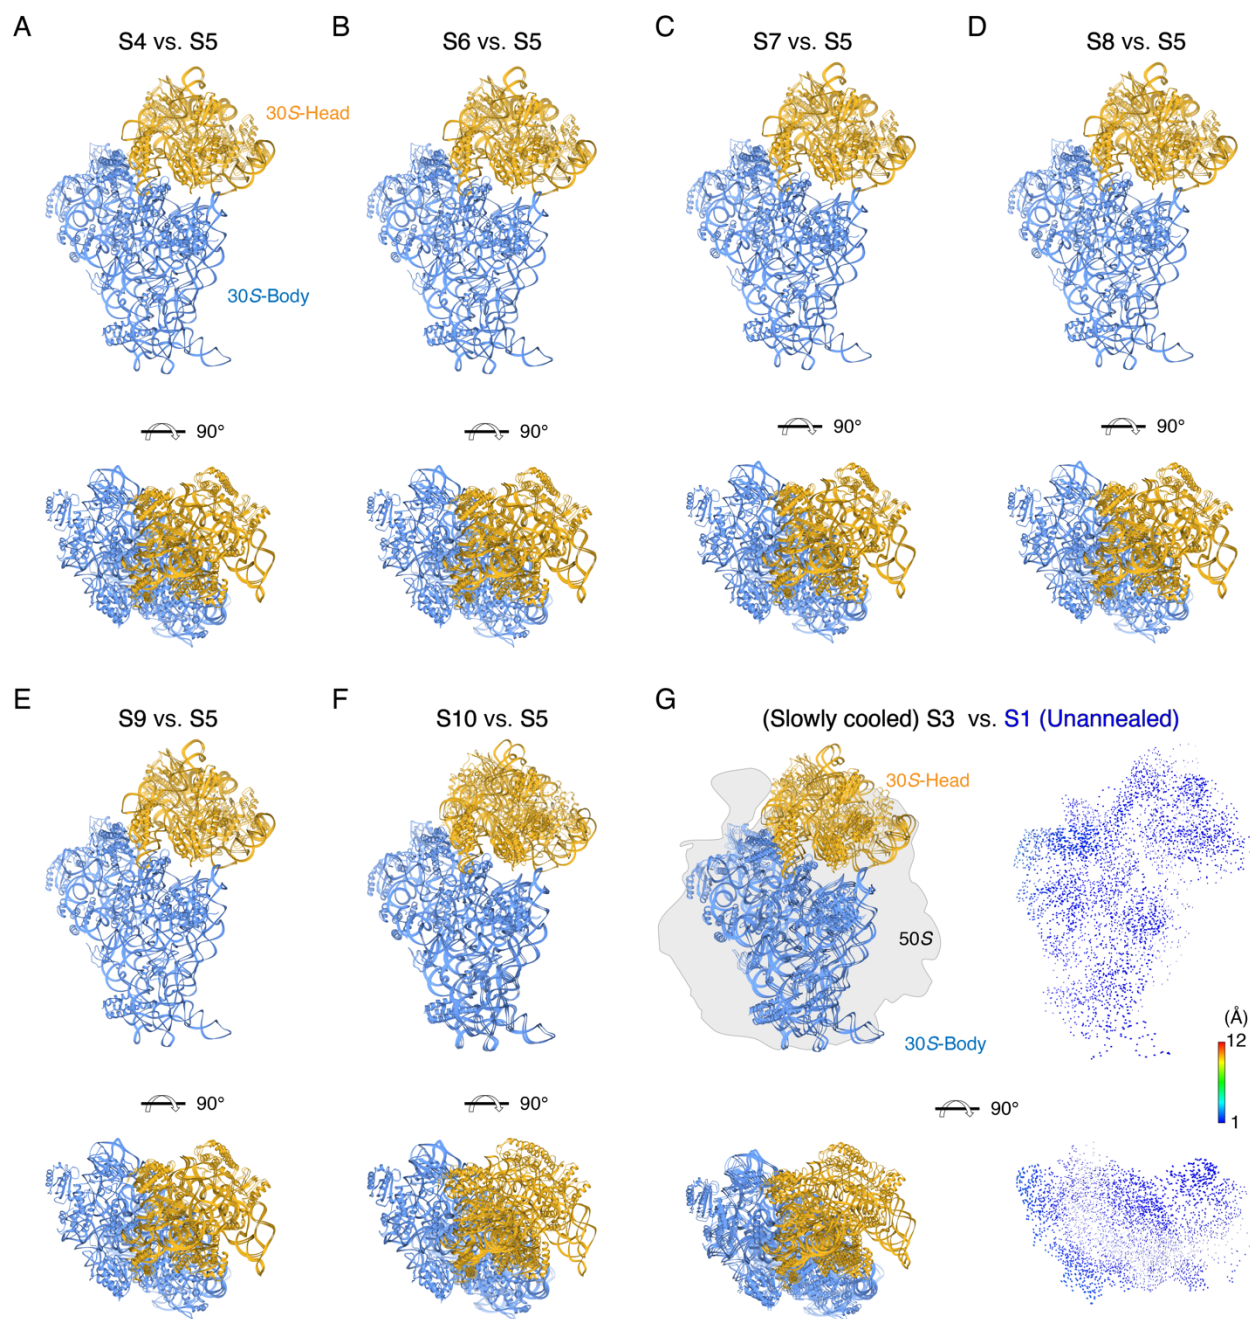

**Figure S10.** Rotational comparison of 30S subunits under various annealing conditions (*A–F*) 50S subunits under various annealing conditions were aligned as the reference, and atomic models for the 30S subunits are shown. S1, S3, and S4–S10 correspond to annealing conditions as listed in Fig. 2B. (*G*) Rotational comparison of 30S subunits between slowly cooled and unannealed ribosomes. Left: Atomic models for the 30S subunits. Right: Difference vectors between phosphorous and C $\alpha$  atoms in the 30S subunits.

A

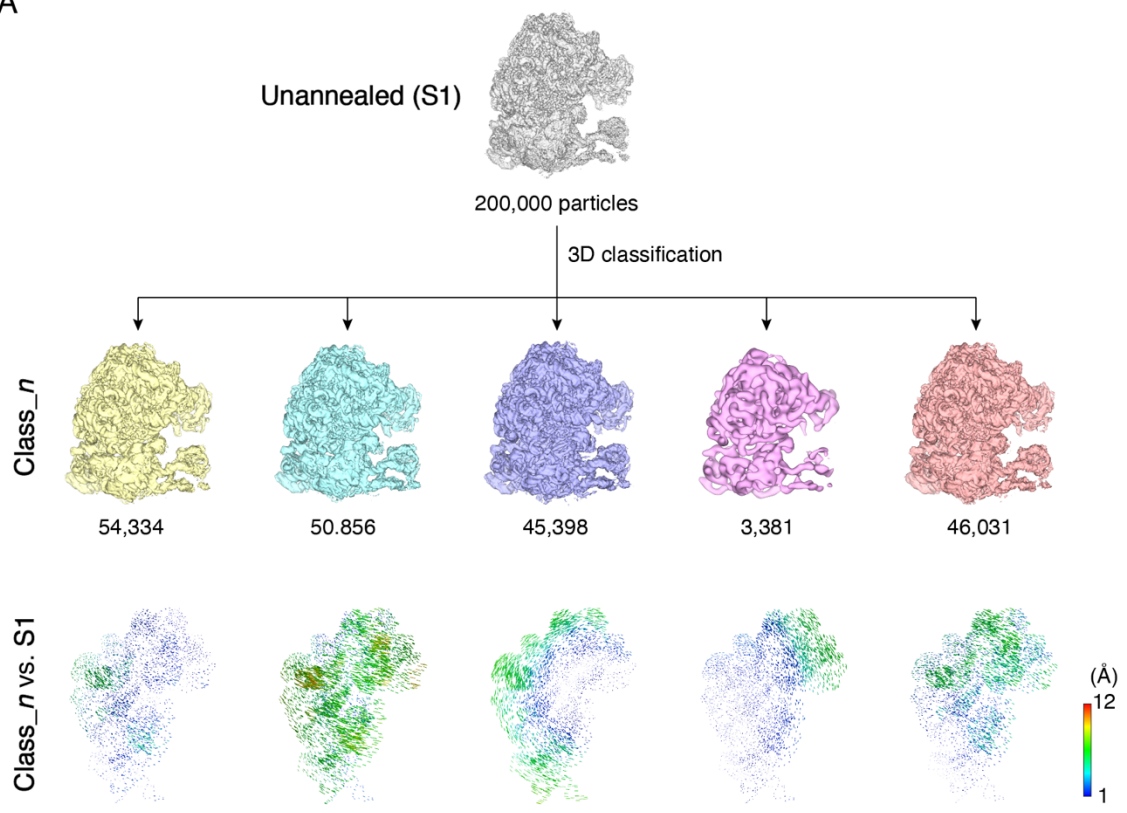

B

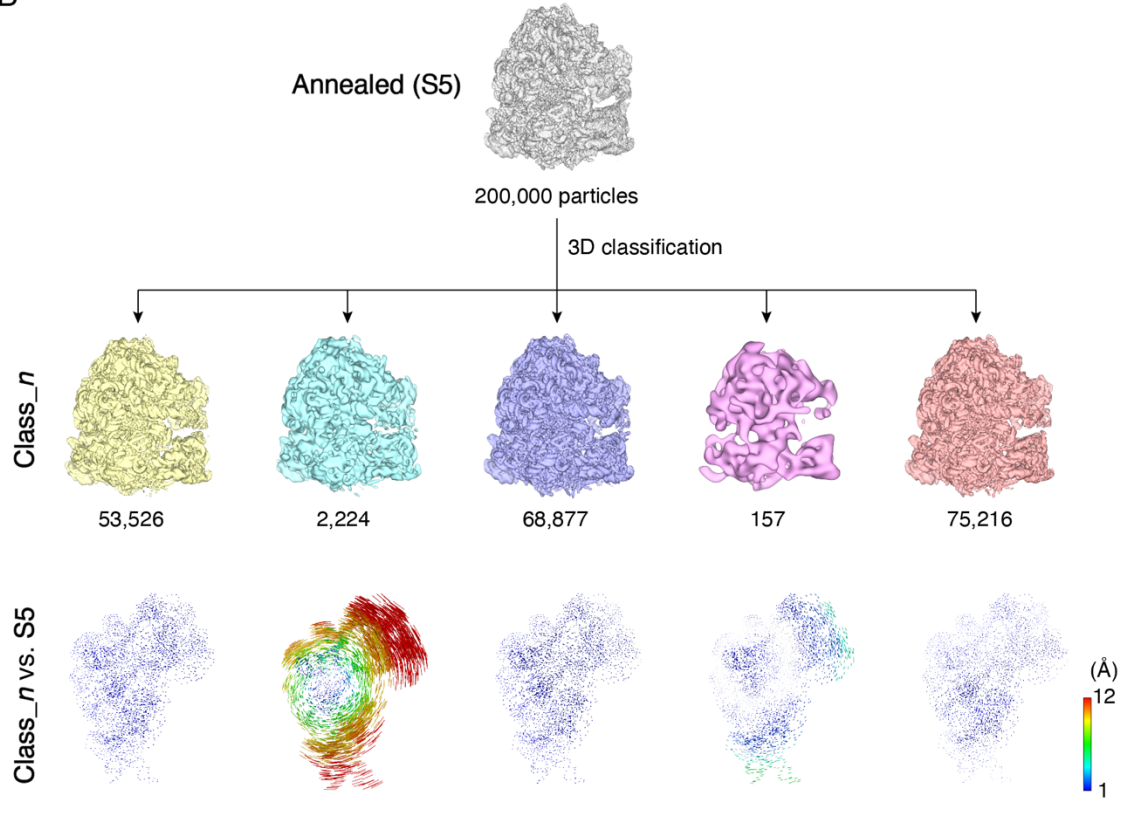

**Figure S11.** Rotational comparison of 30S subunits between 70S ribosomes and their classified structures

(A) 3D classification of the unannealed 70S ribosome (S1) and the rotational comparison of 30S subunits between the annealed ribosomes and their classified structures. 50S subunits were aligned as the reference, and difference vectors between phosphorous and C $\alpha$  atoms in the 30S subunits are shown. (B) 3D classification of the annealed 70S ribosome (S5) and the rotational comparison of 30S subunits between the annealed ribosomes and their classified structures. 50S subunits were aligned as the reference, and difference vectors between phosphorous and C $\alpha$  atoms in the 30S subunits are shown.

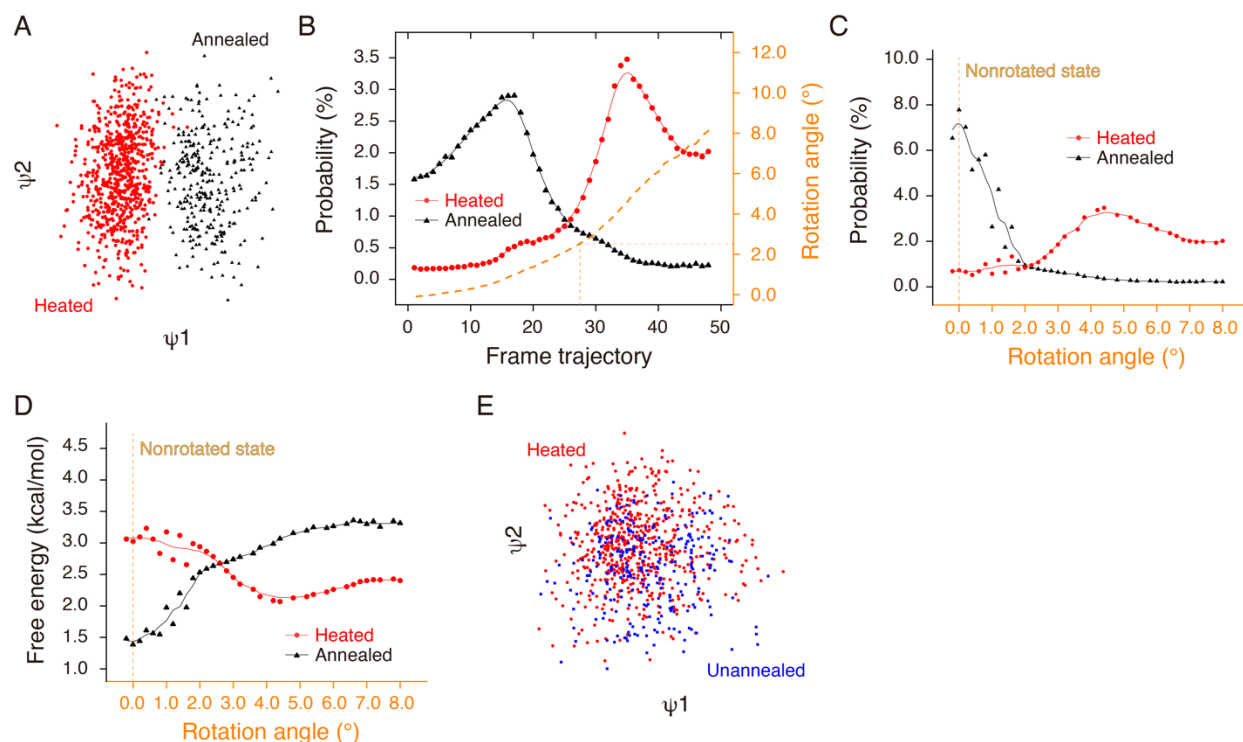

**Figure S12.** Free-energy minimization occurs during cooling from the heated ribosome to the annealed ribosome

(A) Initial manifold snapshots of the 70S ribosome in one projection direction. The points are colored in accordance with the heated and annealed subsets. The projection direction is approximately orthogonal to the interface between the 50S and 30S subunits. (B) Particle distribution of the heated and annealed ribosomes along the frame trajectory. The 3D structure at each frame was reconstructed, and the rotation angle of 30S subunit with respect to the nonrotated state was calculated. (C) Particle distribution of the heated and annealed ribosomes along the rotation angle. Particle distribution was recalculated with the rotation angle at an interval of  $0.2^\circ$ , and a moving average was used to smooth the data variation. (D) Free-energy distribution of the heated and annealed ribosomes along the rotation angle. The free energy was calculated from the fitted curve in (C). The free energy for heated and annealed ribosomes was calculated via the Boltzmann formula with the respective temperature at 310 K and 273 K. (E) Initial manifold snapshots of the 70S ribosome in one projection direction. The points are colored in accordance with the unannealed and heated subsets. It is challenging to efficiently separate two states.



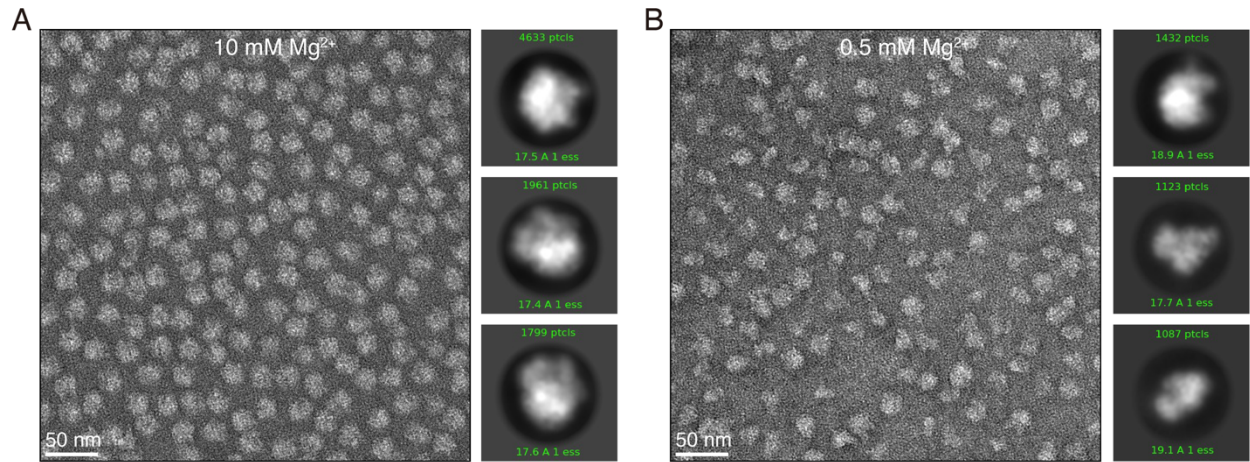

**Figure S13.** 70S ribosome dissociates at 0.5 mM Mg<sup>2+</sup> concentration

(A) Typical negative-stain image and the 2D class average of the 70S ribosome at 10 mM Mg<sup>2+</sup> concentration. (B) Typical negative-stain image and the 2D class average of the 70S ribosome at 0.5 mM Mg<sup>2+</sup> concentration.

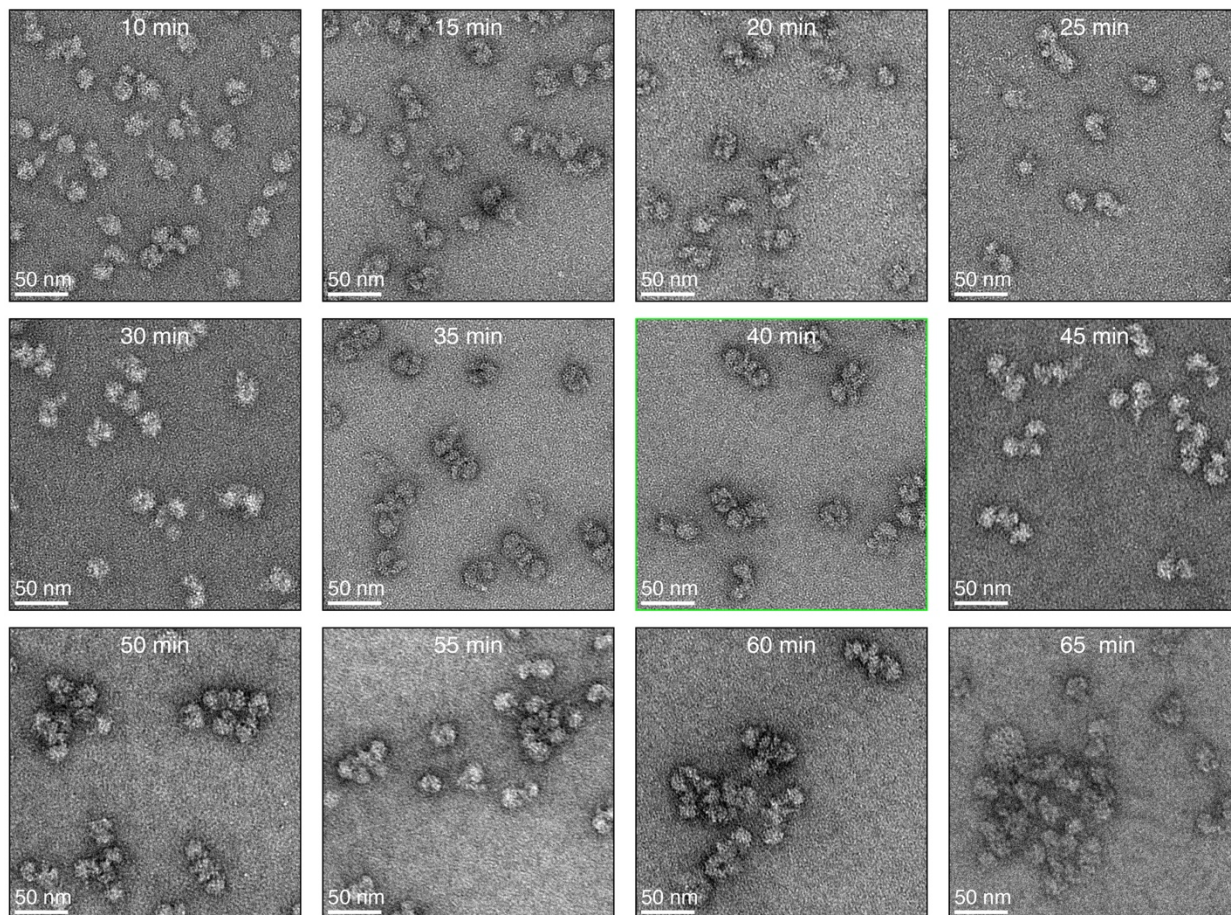

**Figure S14.** Glutaraldehyde cross-links 70S ribosome from dissociation at 0.5 mM  $Mg^{2+}$  concentration

A series of negative-stain images at various GA cross-linking times. After 40 min of cross-linking, the 70S ribosome will not dissociate at 0.5 mM  $Mg^{2+}$  concentration. An even longer cross-linking time will incur the 70S ribosome into clusters or aggregates.

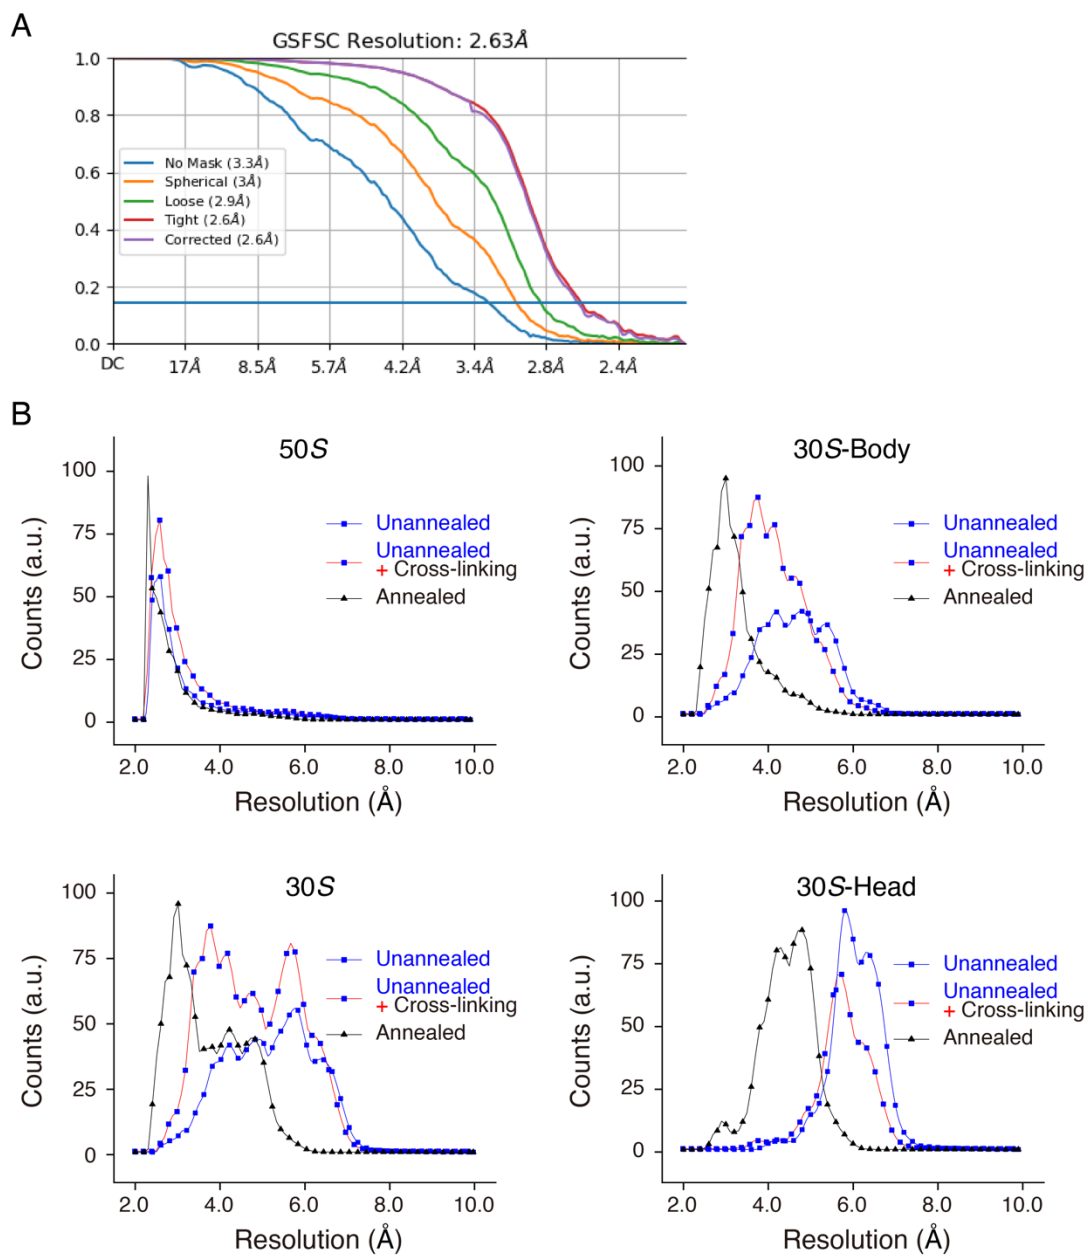

**Figure S15.** FSC curve and local resolution histograms of the unannealed ribosome after GA cross-linking

(A) FSC curve for the GA cross-linked ribosome. (B) Local resolution histograms of the GA cross-linked ribosome. The mean and standard deviation from these histograms were calculated (SI Appendix, Fig. S16B).

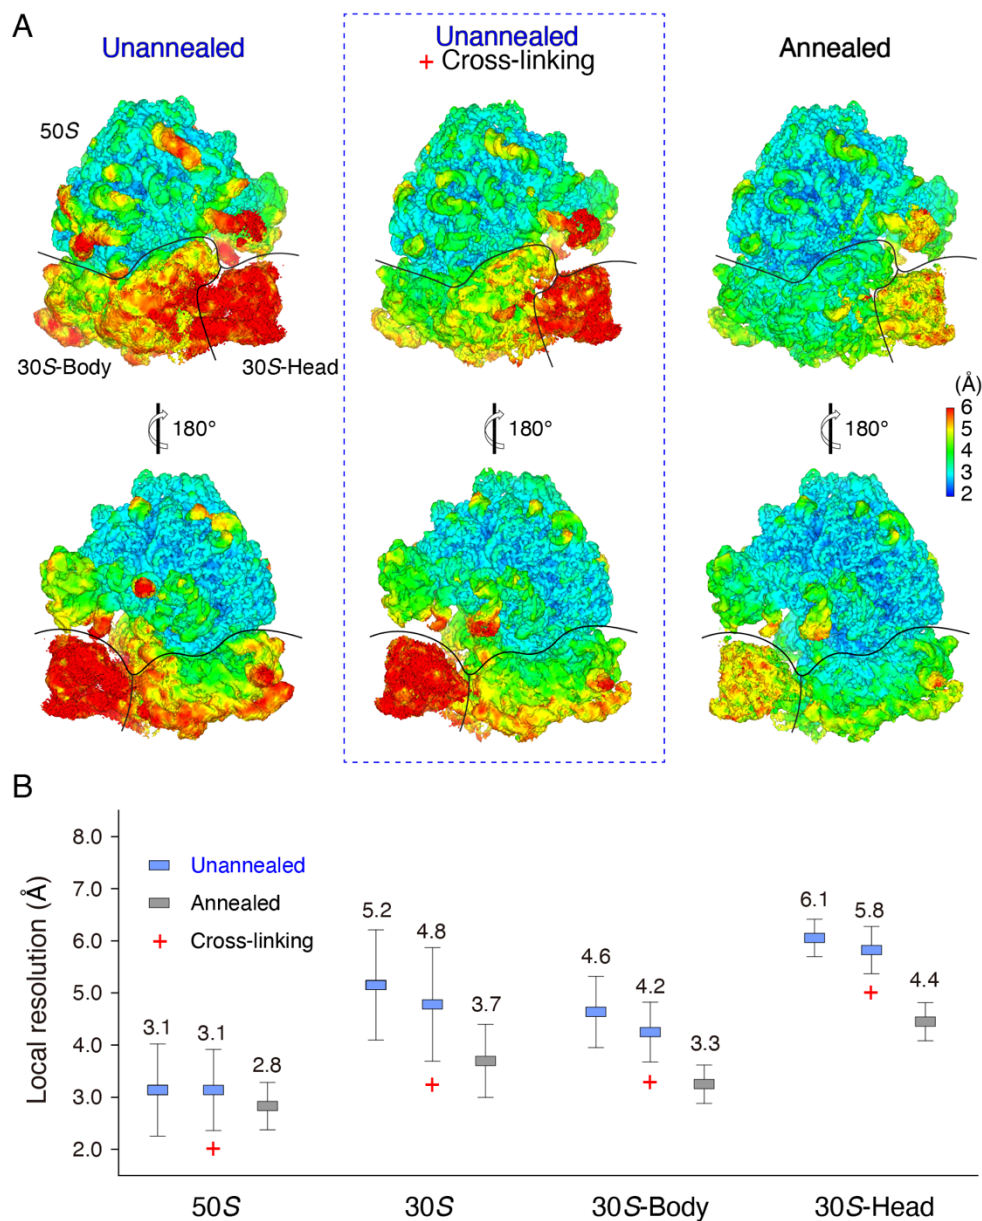

**Figure S16.** The effect of GA cross-linking on the unannealed ribosome

(A) Structural comparison between the GA cross-linked ribosome and the unannealed/annealed ribosomes. For direct comparison, local resolution maps of unannealed and annealed 70S ribosomes are re-used from Fig. 1. The GA cross-linked ribosome is marked in the dashed rectangle. (B) Local resolution comparison of the GA cross-linked ribosome with the unannealed/annealed ribosomes. The respective means and standard deviations were calculated from *SI Appendix*, Fig. S15B.

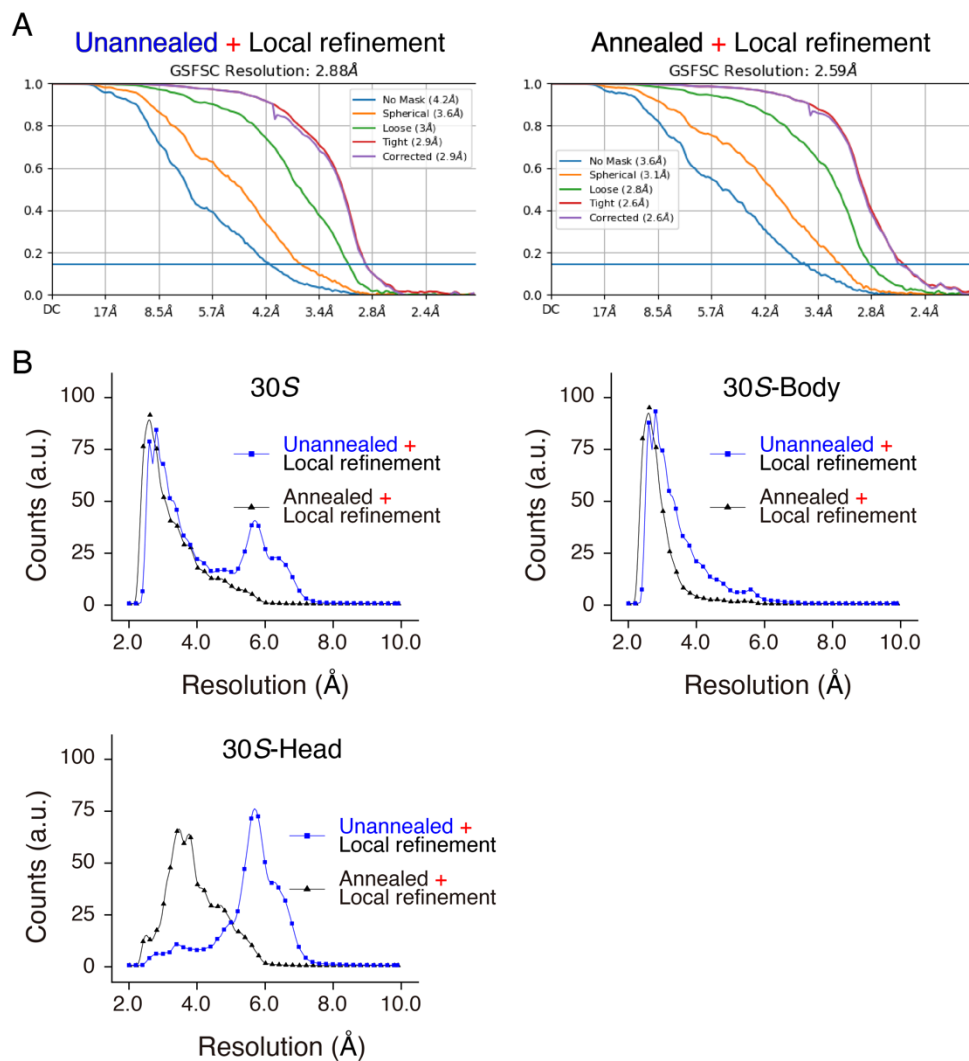

**Figure S17.** Resolution estimation of 30S subunits after local refinements

(A) FSC curves for 30S subunits after local refinements on unannealed and annealed ribosomes. (B) Local resolution histograms of the 30S subunit and subdomains after local refinements on unannealed and annealed ribosomes. The mean and standard deviation from these histograms were calculated (*SI Appendix*, Fig. S18B)

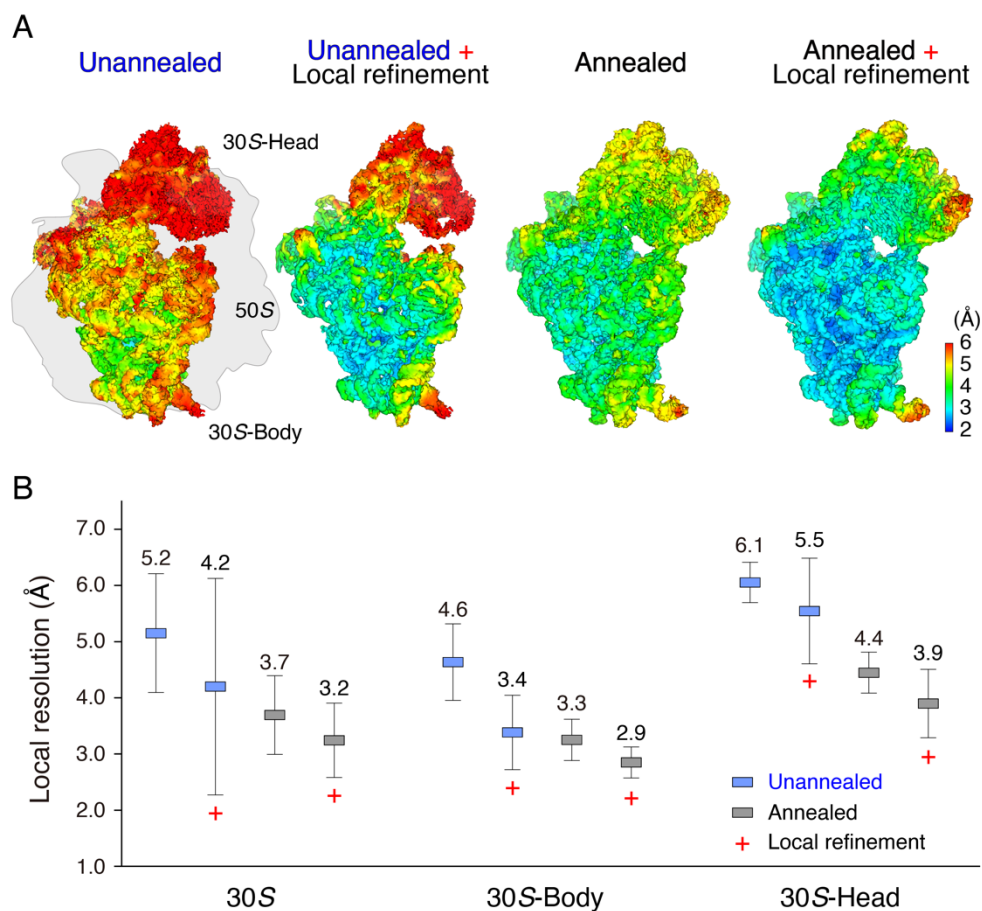

**Figure S18.** Structural comparison of 30S subunits before/after local refinements  
 (A) Local resolution maps of 30S subunits under various conditions. (B) Local resolution comparison of unannealed and annealed 30S subunits before/after local refinements. The respective means and standard deviations were calculated from *SI Appendix*, Fig. S17B.

**Table S1. Cryo-EM data collection and data processing statistics**

|                                                   | Heated ribosome<br>(S2)      | Unannealed (S1)<br>and annealed (S3–<br>S10) ribosomes |
|---------------------------------------------------|------------------------------|--------------------------------------------------------|
| <b>Sample preparation</b>                         |                              |                                                        |
| Concentration (nM)                                | 700                          | 700                                                    |
| Loading volume ( $\mu\text{L}$ )                  | 4.5                          | 4                                                      |
| Chamber temperature ( $^{\circ}\text{C}$ )        | 37                           | 4                                                      |
| Chamber humidity (%)                              | 100                          | 100                                                    |
| Blot time (s)                                     | 0.5                          | 0.5                                                    |
| Blot force                                        | –5                           | –2                                                     |
| <b>Data collection and processing</b>             |                              |                                                        |
| Microscope                                        | Titan Krios G <sup>3i</sup>  |                                                        |
| Voltage (kV)                                      | 300                          |                                                        |
| Camera                                            | Gatan K3 BioQuantum          |                                                        |
| Magnification                                     | 81,000                       |                                                        |
| Electron exposure ( $\text{e}^{-}/\text{\AA}^2$ ) | 60                           |                                                        |
| Defocus range ( $\mu\text{m}$ )                   | 1.0–1.5                      |                                                        |
| Pixel size ( $\text{\AA}$ )                       | 0.53                         |                                                        |
| Symmetry imposed                                  | C1                           |                                                        |
| Initial particle images (no.)                     | <i>SI Appendix, Fig. S2B</i> |                                                        |
| Final particle images (no.)                       | <i>SI Appendix, Fig. S2B</i> |                                                        |
| Map resolution ( $\text{\AA}$ )                   | <i>SI Appendix, Fig. S3</i>  |                                                        |
| FSC threshold                                     | 0.143                        |                                                        |
| Map resolution range ( $\text{\AA}$ )             | <i>SI Appendix, Fig. S6</i>  |                                                        |

**Movie S1.** Cartoon that illustrates how to use the mist umbrella

**Movie S2.** Typical movies for structural variation of the unannealed, heated, and annealed ribosomes
